# Supplementary material for: Conformational regulation and target-myristoyl switch of calcineurin B homologous protein 3
Source: eLife journal article supplement (doi:10.7554/elife.83868), 2023-07-12
Supplement: fig4-data1 [file elife-83868-fig4-data1-v2.zip]

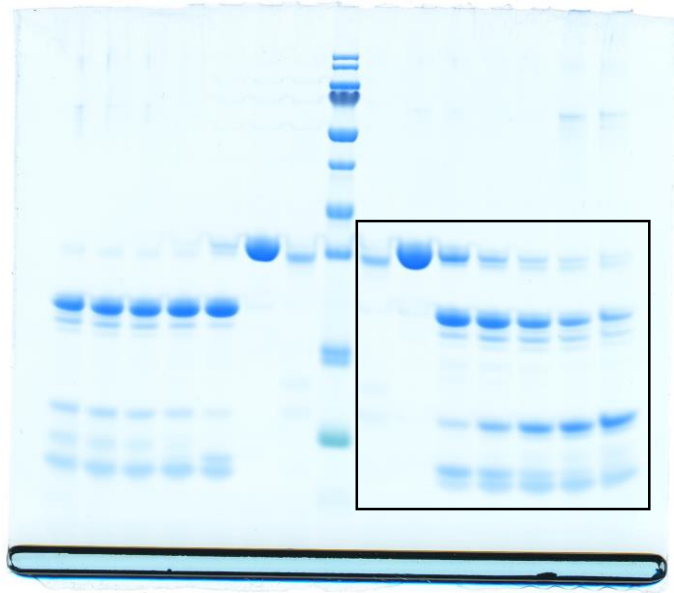

Fig.4A top

Gel sections are shown in Figure 4B CHP3  $\text{Ca}^{2+}+\text{Mg}^{2+}$  condition; the gel is the same as raw 1 gel 3 in Figure 4-figure supplement 1

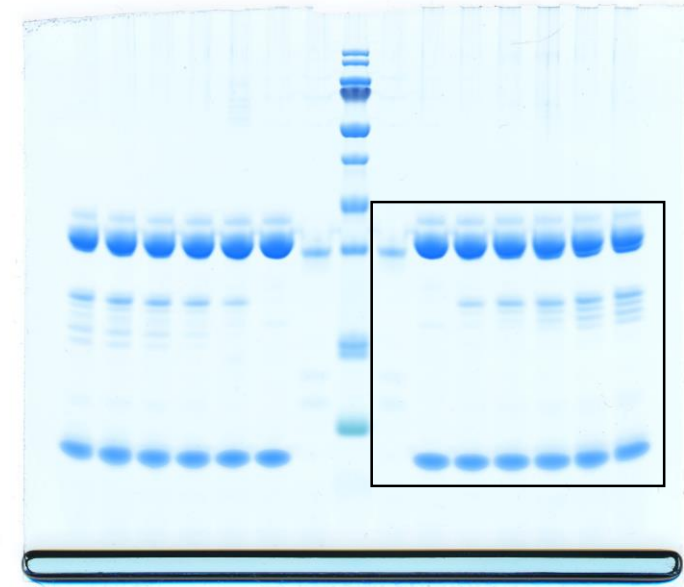

Fig.4A bottom

Gel sections are shown in Figure 4B CHP3:CBD  $\text{Ca}^{2+}+\text{Mg}^{2+}$  condition; the gel is the same as raw 3 gel 3 in Figure 4-figure supplement 1
