# Supplementary material for: Conformational regulation and target-myristoyl switch of calcineurin B homologous protein 3
Source: eLife journal article supplement (doi:10.7554/elife.83868), 2023-07-12
Supplement: fig4-figsupp1-data1 [file elife-83868-fig4-figsupp1-data1-v2.zip]

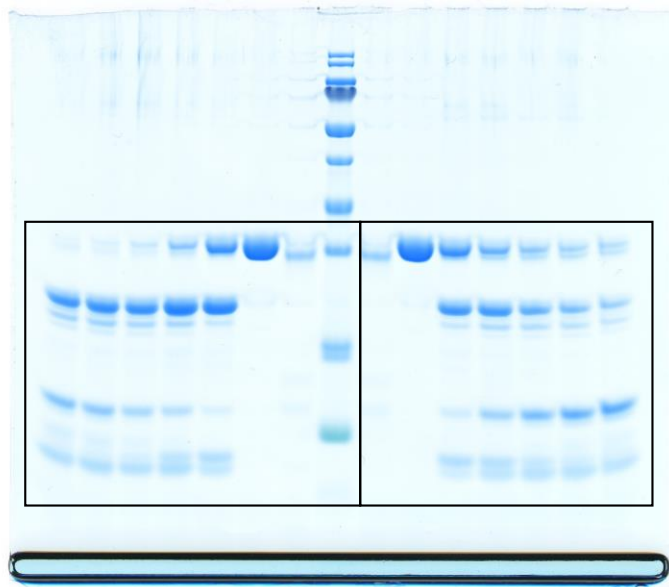

raw 1, gel 1  
mirrowed

raw 1, gel 2

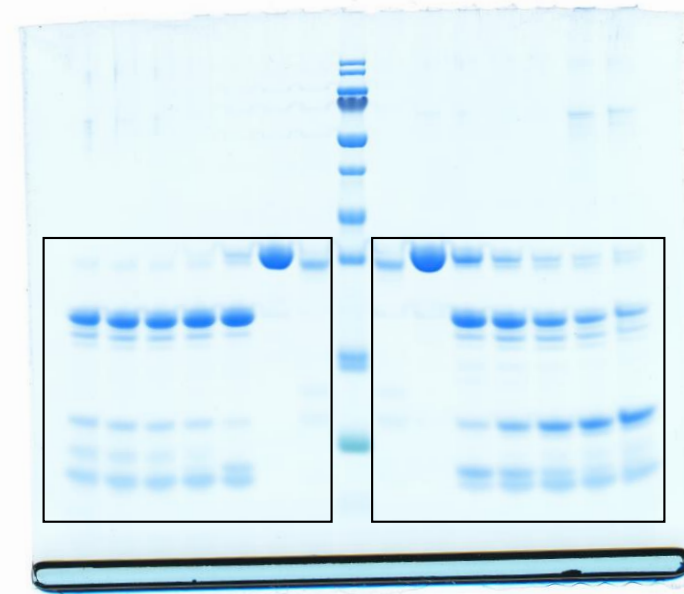

raw 1, gel 4  
mirrowed

raw 1, gel 3

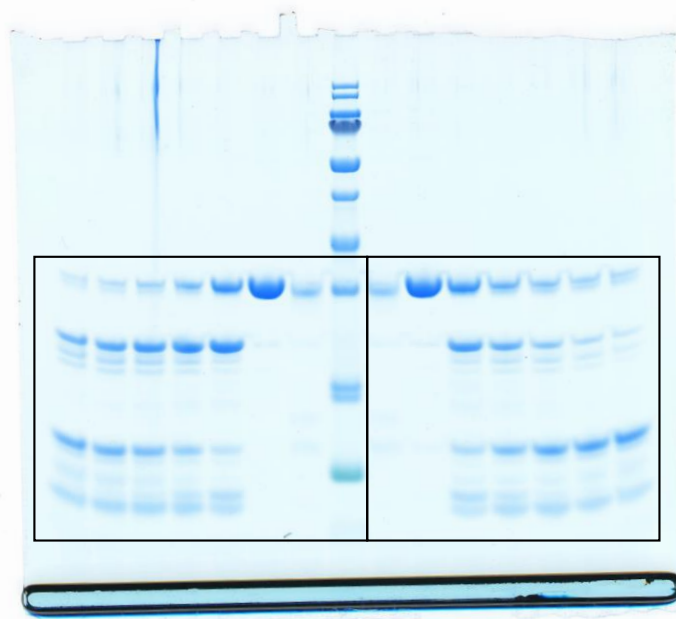

raw 2, gel 1  
mirrowed

raw 2, gel 2

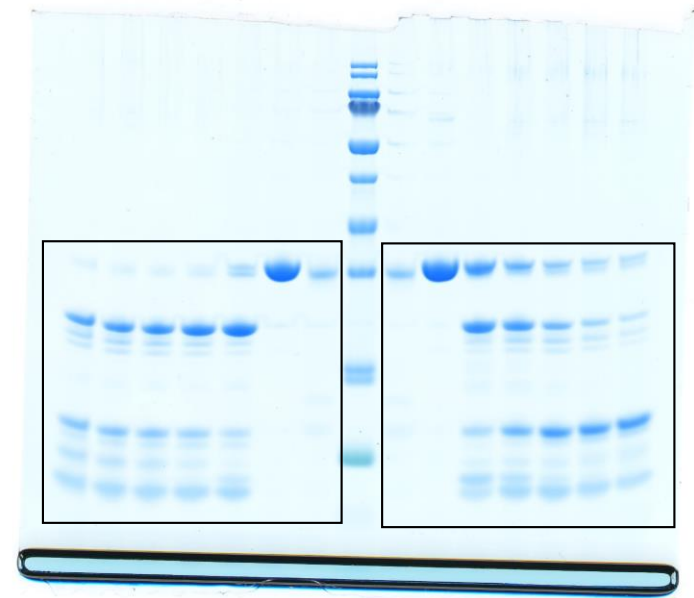

raw 2, gel 4  
mirrowed

raw 2, gel 3

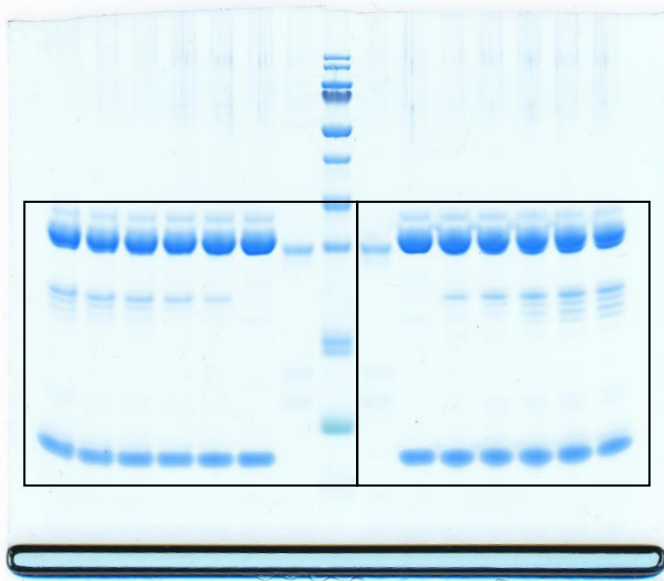

raw 3, gel 1  
mirrowed

raw 3, gel 2

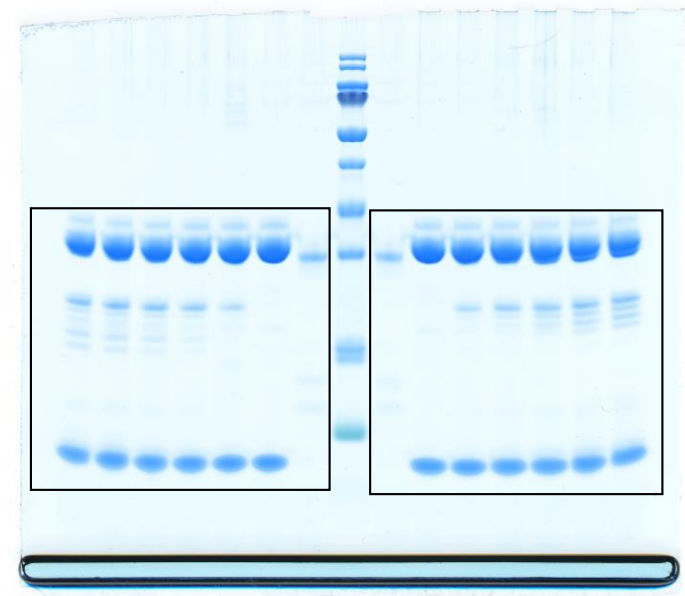

raw 3, gel 4  
mirrowed

raw 3, gel 3

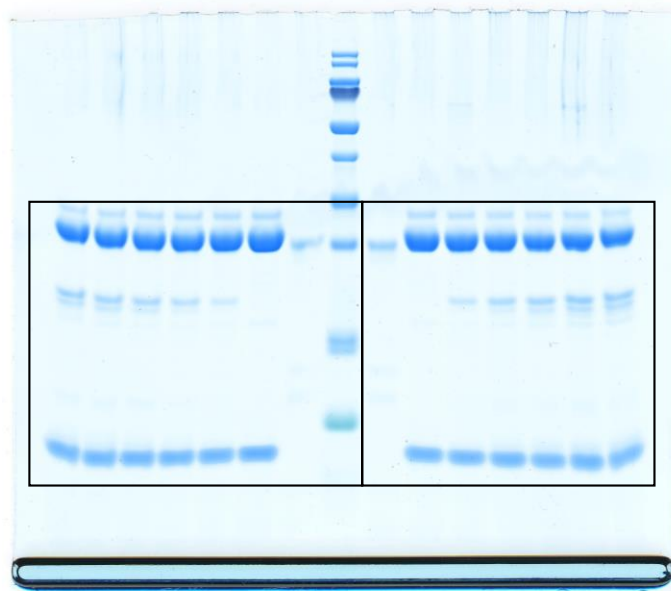

raw 4, gel 1  
mirrowed

raw 4, gel 2

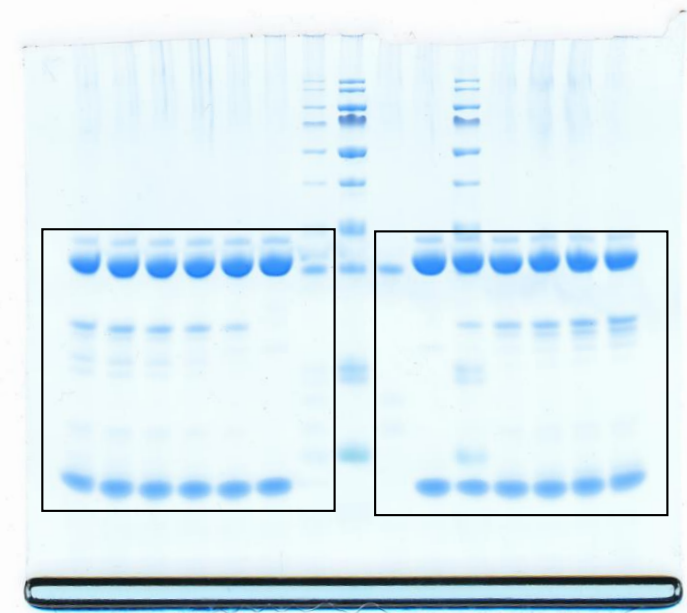

raw 4, gel 4  
mirrowed

raw 4, gel 3
