# Supplementary material for: Conformational regulation and target-myristoyl switch of calcineurin B homologous protein 3
Source: eLife journal article supplement (doi:10.7554/elife.83868), 2023-07-12
Supplement: fig6-data1 [file elife-83868-fig6-data1-v2.zip]

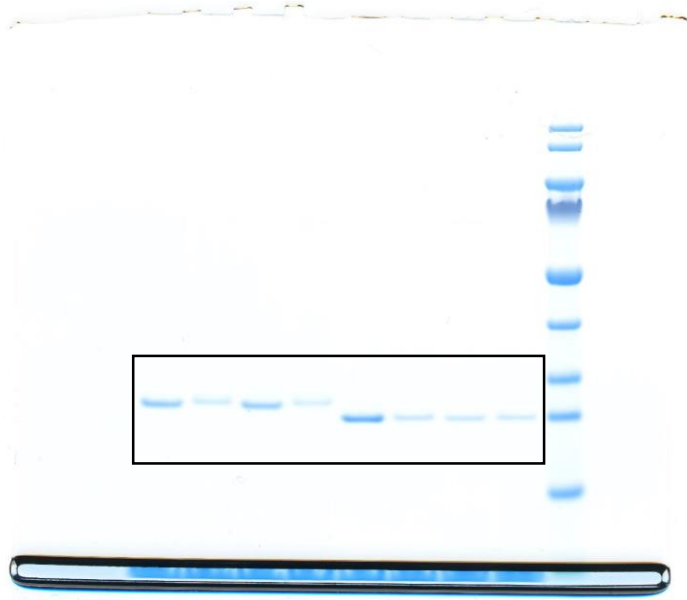

Fig. 6A top  
mirrored

Recoverin, CHP3  
replicate 1

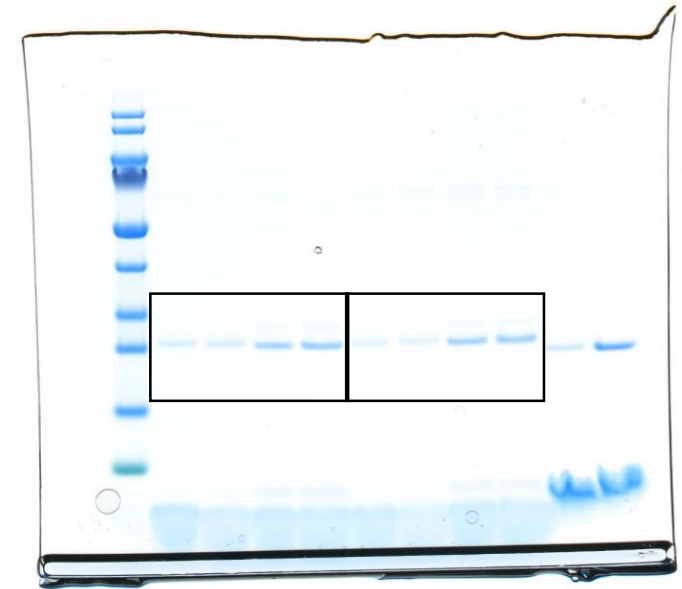

Fig. 6A bottom

CHP3:CBD  
replicate 1

CHP3:CBD  
replicate 2

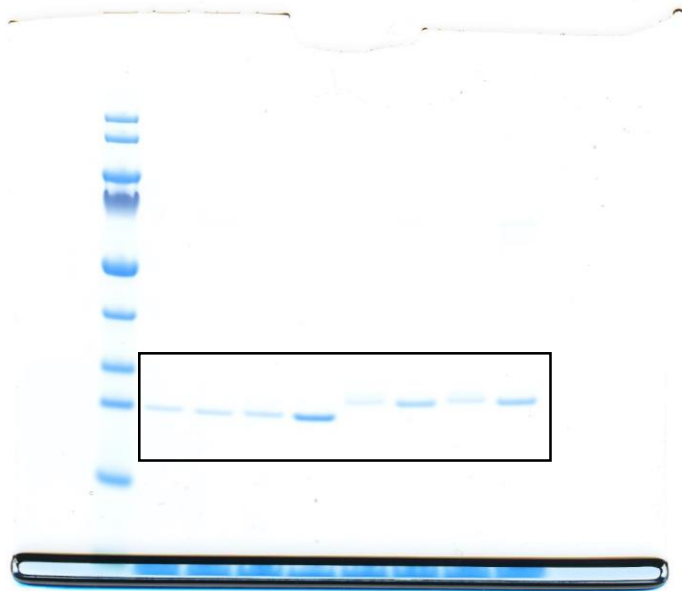

Recoverin, CHP3  
replicate 2

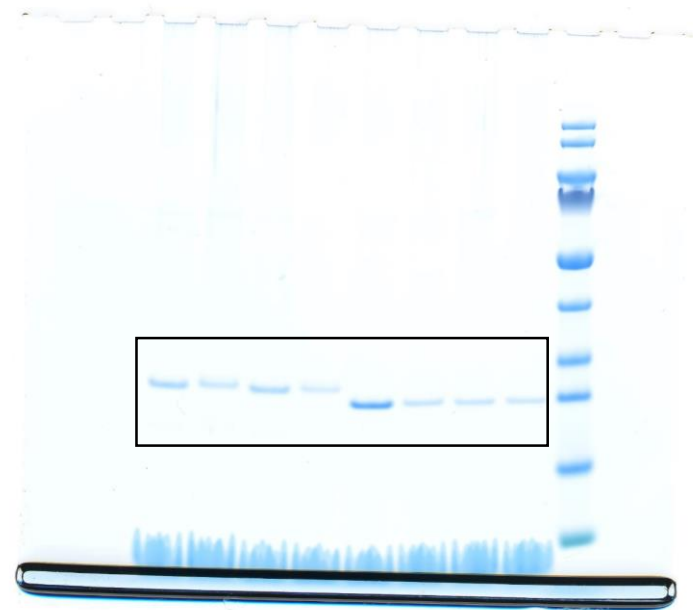

Recoverin, CHP3  
replicate 3  
mirrored

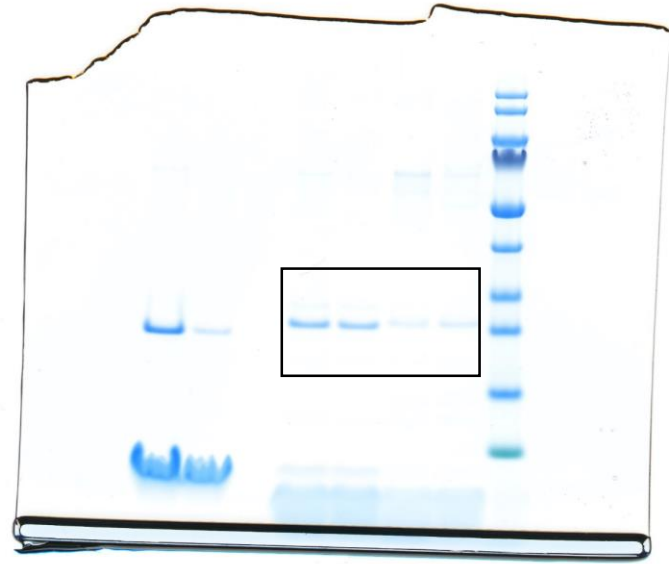

CHP3:CBD  
replicate 3  
mirrored
