# Supplementary material for: Conformational regulation and target-myristoyl switch of calcineurin B homologous protein 3
Source: eLife journal article supplement (doi:10.7554/elife.83868), 2023-07-12
Supplement: fig6-data1 [file Figure6B_source_data.xlsx]

## Sheet: gel qauntification raw data
	Recoverin				CHP3				CHP3:CBD
myristoylation	-	-	+	+	-	-	+	+	-	-	+	+
Ca2+	-	+	-	+	-	+	-	+	-	+	-	+
biol.repl.1	1	1.06601	1.2255	4.66132	1	2.87424	1.13452	3.05705	1	1.16525	2.92693	3.80077
biol.repl.2	1	1.40702	1.57949	5.11243	1	2.50344	1.15404	2.86959	1	1.12233	4.04546	4.60263
biol.repl.3	1	1.0689	1.21449	4.64917	1	2.25595	1.5197	2.39773	1	0.787771	3.41718	5.42278

## Sheet: ANOVA p-values
	Rec -Ca2+	Rec +Ca2+	mRec -Ca2+	mRec +Ca2+			CHP3 -Ca2+	CHP3 +Ca2+	mCHP3 -Ca2+	mCHP3 +Ca2+			CHP3:CBD -Ca2+	CHP3:CBD +Ca2+	mCHP3:CBD -Ca2+	mCHP3:CBD +Ca2+
Rec -Ca2+		0.67848	0.21964	0		CHP3 -Ca2+		0.00033987	0.59	0.00012609		CHP3:CBD -Ca2+		0.99991	0.00147	0.000103292
Rec +Ca2+			0.75248	0		CHP3 +Ca2+			0.00126	0.69529		CHP3:CBD +Ca2+			0.00157	0.000111316
mRec -Ca2+				0		mCHP3 -Ca2+				0.000406683		mCHP3:CBD -Ca2+				0.09007
