# Supplementary figures and images for: Conformational regulation and target-myristoyl switch of calcineurin B homologous protein 3
Source: eLife journal article supplement (doi:10.7554/elife.83868), 2023-07-12

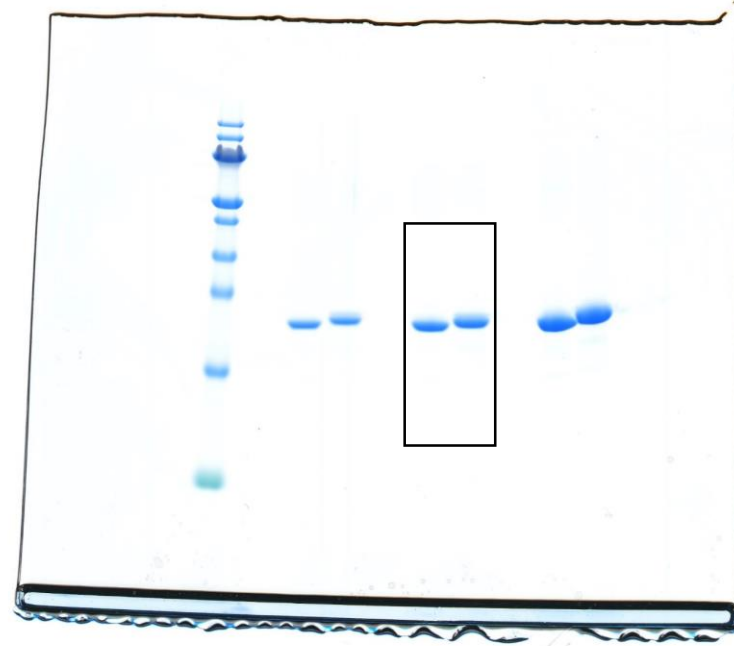

Fig.1A  
mirrored

Supplement: fig1-data1 [file elife-83868-fig1-data1-v2.zip]
